# Supplementary material
Source: PubMed Central journal article supplement (PMC3469757)
Supplement: NIHMS407503-supplement-1_si_001.pdf [file NIHMS407503-supplement-1_si_001.pdf]

**2-(3-Fluoro-4-methylsulfonylaminophenyl) Propanamides as Potent Transient Receptor Potential Vanilloid 1 (TRPV1) Antagonists: Structure Activity Relationships of 2-Amino Derivatives in the N-(6-trifluoromethylpyridin-3-ylmethyl) C-region**

Myeong Seop Kim,<sup>†</sup> HyungChul Ryu,<sup>†</sup> Dong Wook Kang,<sup>†</sup> Seong-Hee Cho,<sup>†</sup> Sejin Seo,<sup>†</sup> Young Soo Park,<sup>†</sup> Mi-Yeon Kim,<sup>†</sup> Eun Joo Kwak,<sup>†</sup> Yong Soo Kim,<sup>†</sup> Rahul S. Bhondwe,<sup>†</sup> Ho Shin Kim,<sup>†</sup> Seul-gi Park,<sup>‡</sup> Karam Son,<sup>‡</sup> Sun Choi,<sup>‡</sup> Ian DeAndrea-Lazarus,<sup>§</sup> Larry V. Pearce,<sup>§</sup> Peter M. Blumberg,<sup>§</sup> Robert Frank,<sup>||</sup> Gregor Bahrenberg,<sup>||</sup> Hannelore Stockhausen,<sup>||</sup> Thomas Christoph,<sup>||</sup> Jeewoo Lee<sup>\*†</sup>

**HPLC Purity and conditions**

Columns      A:      Agilent TC-C18 (5  $\mu$ m, 4.6 x 250 mm)  
                   B:      Agilent Eclipse Plus (5  $\mu$ m, 4.6 x 250 mm)  
                   C:      Daicel Chiralcel OD-H (5  $\mu$ m, 4.6 x 250 mm)

Conditions :      Flow Rate: 0.8 mL/min, 1.0 mL/min (isocratic)  
                           Wavelength: 254 nm

| Compound | Column | Flow rate [mL/min] | Eluent             | Retention time [min] | Purity [%] |
|----------|--------|--------------------|--------------------|----------------------|------------|
| 13       | A      | 0.8                | 80:20 <sup>a</sup> | 6.27                 | 99.34      |
| 14       | A      | 0.8                | 80:20 <sup>a</sup> | 7.24                 | 96.48      |
| 16       | A      | 1.0                | 80:20 <sup>a</sup> | 5.82                 | 95.86      |
| 17       | A      | 0.8                | 80:20 <sup>a</sup> | 6.10                 | 95.90      |
| 18       | A      | 0.8                | 80:20 <sup>a</sup> | 6.00                 | 95.75      |
| 19       | A      | 0.8                | 80:20 <sup>a</sup> | 7.27                 | 98.97      |
| 20       | A      | 0.8                | 80:20 <sup>a</sup> | 7.28                 | 95.54      |
| 21       | A      | 0.8                | 80:20 <sup>a</sup> | 6.65                 | 96.43      |
| 22       | A      | 0.8                | 80:20 <sup>a</sup> | 5.90                 | 99.27      |
| 23       | A      | 0.8                | 80:20 <sup>a</sup> | 6.71                 | 99.01      |
| 24       | A      | 0.8                | 80:20 <sup>a</sup> | 3.30                 | 98.78      |

|            |   |     |                    |              |       |
|------------|---|-----|--------------------|--------------|-------|
| <b>25</b>  | A | 0.8 | 80:20 <sup>a</sup> | 3.30         | 95.39 |
| <b>26</b>  | B | 0.8 | 60:40 <sup>c</sup> | 5.69         | 96.42 |
| <b>27</b>  | A | 0.8 | 80:20 <sup>a</sup> | 7.57         | 98.23 |
| <b>28</b>  | A | 0.8 | 80:20 <sup>a</sup> | 7.21         | 97.69 |
| <b>29</b>  | A | 0.8 | 80:20 <sup>a</sup> | 6.87         | 97.71 |
| <b>30</b>  | A | 0.8 | 80:20 <sup>a</sup> | 6.15         | 97.84 |
| <b>31</b>  | A | 0.8 | 80:20 <sup>a</sup> | 6.15         | 97.84 |
| <b>32</b>  | A | 0.8 | 80:20 <sup>a</sup> | 5.50         | 95.10 |
| <b>33</b>  | A | 0.8 | 80:20 <sup>a</sup> | 5.30         | 98.85 |
| <b>34</b>  | C | 1.0 | 80:20 <sup>d</sup> | 11.42, 14.58 | 98.40 |
| <b>35</b>  | C | 1.0 | 80:20 <sup>d</sup> | 14.59        | 95.76 |
| <b>36</b>  | C | 1.0 | 80:20 <sup>d</sup> | 13.49        | 95.44 |
| <b>37</b>  | C | 1.0 | 80:20 <sup>d</sup> | 10.86        | 96.61 |
| <b>38</b>  | C | 1.0 | 60:40 <sup>g</sup> | 7.40         | 96.64 |
| <b>39</b>  | C | 1.0 | 80:20 <sup>d</sup> | 22.72        | 96.64 |
| <b>40</b>  | C | 1.0 | 70:30 <sup>e</sup> | 11.39        | 95.17 |
| <b>41</b>  | C | 1.0 | 50:50 <sup>e</sup> | 9.72         | 95.87 |
| <b>42</b>  | C | 1.0 | 60:40 <sup>g</sup> | 7.53         | 96.84 |
| <b>43</b>  | C | 1.0 | 60:40 <sup>f</sup> | 7.29         | 96.68 |
| <b>44</b>  | A | 0.8 | 80:20 <sup>a</sup> | 6.07         | 95.27 |
| <b>45</b>  | A | 0.8 | 80:20 <sup>a</sup> | 5.68         | 96.85 |
| <b>45S</b> | C | 1.0 | 80:20 <sup>d</sup> | 9.34         | 96.21 |
| <b>46</b>  | A | 0.8 | 80:20 <sup>a</sup> | 5.45         | 96.53 |

|            |   |     |                    |       |       |
|------------|---|-----|--------------------|-------|-------|
| <b>47</b>  | A | 1.0 | 80:20 <sup>a</sup> | 3.67  | 95.31 |
| <b>48</b>  | A | 1.0 | 80:20 <sup>a</sup> | 5.03  | 99.55 |
| <b>49</b>  | A | 0.8 | 80:20 <sup>a</sup> | 6.38  | 99.01 |
| <b>49S</b> | C | 1.0 | 80:20 <sup>h</sup> | 9.94  | 96.68 |
| <b>49R</b> | C | 1.0 | 80:20 <sup>h</sup> | 8.23  | 95.16 |
| <b>50</b>  | A | 0.8 | 80:20 <sup>a</sup> | 7.32  | 99.26 |
| <b>51</b>  | A | 0.8 | 80:20 <sup>a</sup> | 6.98  | 99.55 |
| <b>52</b>  | A | 0.8 | 80:20 <sup>a</sup> | 7.33  | 97.99 |
| <b>53</b>  | A | 0.8 | 80:20 <sup>a</sup> | 7.26  | 98.69 |
| <b>54</b>  | B | 0.8 | 70:30 <sup>b</sup> | 36.93 | 95.73 |
| <b>55</b>  | A | 0.8 | 80:20 <sup>a</sup> | 7.21  | 97.28 |
| <b>56</b>  | A | 0.8 | 80:20 <sup>a</sup> | 7.05  | 95.97 |
| <b>57</b>  | A | 0.8 | 80:20 <sup>a</sup> | 8.05  | 99.56 |
| <b>58</b>  | A | 0.8 | 80:20 <sup>a</sup> | 9.60  | 99.39 |
| <b>59</b>  | A | 0.8 | 80:20 <sup>a</sup> | 8.09  | 97.31 |
| <b>60</b>  | A | 0.8 | 80:20 <sup>a</sup> | 8.18  | 95.82 |
| <b>61</b>  | A | 0.8 | 80:20 <sup>a</sup> | 5.12  | 95.90 |
| <b>62</b>  | A | 0.8 | 80:20 <sup>a</sup> | 5.09  | 95.06 |
| <b>63</b>  | A | 0.8 | 80:20 <sup>a</sup> | 5.89  | 96.46 |
| <b>64</b>  | A | 0.8 | 80:20 <sup>a</sup> | 4.44  | 96.97 |
| <b>65</b>  | A | 0.8 | 80:20 <sup>a</sup> | 4.15  | 99.43 |
| <b>66</b>  | A | 0.8 | 80:20 <sup>a</sup> | 4.99  | 99.10 |
| <b>67</b>  | A | 0.8 | 80:20 <sup>a</sup> | 5.47  | 99.27 |

|           |   |     |                    |      |       |
|-----------|---|-----|--------------------|------|-------|
| <b>68</b> | A | 0.8 | 80:20 <sup>a</sup> | 5.40 | 99.25 |
| <b>69</b> | A | 0.8 | 80:20 <sup>a</sup> | 7.25 | 99.09 |
| <b>70</b> | A | 0.8 | 80:20 <sup>a</sup> | 5.95 | 99.25 |
| <b>71</b> | A | 1.0 | 80:20 <sup>a</sup> | 4.02 | 99.80 |
| <b>72</b> | A | 0.8 | 80:20 <sup>a</sup> | 6.86 | 99.38 |
| <b>73</b> | A | 0.8 | 80:20 <sup>a</sup> | 5.09 | 95.14 |
| <b>74</b> | B | 0.8 | 80:20 <sup>a</sup> | 3.09 | 95.51 |
| <b>75</b> | A | 0.8 | 80:20 <sup>a</sup> | 5.69 | 97.12 |
| <b>76</b> | A | 0.8 | 80:20 <sup>a</sup> | 5.91 | 96.59 |
| <b>79</b> | A | 0.8 | 80:20 <sup>a</sup> | 6.36 | 99.67 |
| <b>80</b> | A | 0.8 | 80:20 <sup>a</sup> | 7.11 | 99.39 |
| <b>81</b> | A | 0.8 | 80:20 <sup>a</sup> | 3.47 | 95.53 |
| <b>82</b> | B | 0.8 | 90:10 <sup>a</sup> | 2.73 | 98.29 |
| <b>83</b> | A | 0.8 | 80:20 <sup>a</sup> | 3.30 | 95.17 |
| <b>84</b> | A | 0.8 | 80:20 <sup>a</sup> | 4.81 | 98.62 |
| <b>85</b> | A | 0.8 | 80:20 <sup>a</sup> | 4.79 | 99.24 |
| <b>86</b> | A | 0.8 | 80:20 <sup>a</sup> | 4.35 | 98.73 |
| <b>87</b> | A | 0.8 | 80:20 <sup>a</sup> | 6.29 | 98.52 |
| <b>88</b> | A | 0.8 | 80:20 <sup>a</sup> | 5.20 | 99.68 |
| <b>89</b> | B | 0.8 | 80:20 <sup>a</sup> | 6.47 | 95.27 |
| <b>90</b> | A | 0.8 | 80:20 <sup>a</sup> | 3.68 | 96.63 |
| <b>92</b> | B | 0.8 | 90:10 <sup>a</sup> | 2.73 | 99.25 |
| <b>95</b> | A | 0.8 | 80:20 <sup>a</sup> | 6.58 | 96.88 |

|           |   |     |                    |            |       |
|-----------|---|-----|--------------------|------------|-------|
| <b>96</b> | A | 0.8 | 80:20 <sup>a</sup> | 3.31       | 97.42 |
| <b>97</b> | A | 1.0 | 80:20 <sup>a</sup> | 3.71       | 99.02 |
| <b>98</b> | C | 1.0 | 80:20 <sup>b</sup> | 8.54, 9.90 | 98.50 |
| <b>99</b> | A | 0.8 | 80:20 <sup>a</sup> | 4.18       | 95.20 |

<sup>a</sup> Acetonitrile:H<sub>2</sub>O containing 0.1% TFA, <sup>b</sup> MeOH:H<sub>2</sub>O containing 0.1% TFA, <sup>c</sup> MeOH:H<sub>2</sub>O containing 4mM NH<sub>3</sub>, <sup>d</sup> n-Hexane:2-PrOH containing 0.1% TFA, <sup>e</sup> n-Hexane:2-PrOH, <sup>f</sup> n-Heptane:2-PrOH containing 0.1% TFA, <sup>g</sup> n-Heptane:2-PrOH containing 4mM NH<sub>3</sub>, <sup>h</sup> n-Heptane:2-PrOH.
